# Supplementary material for: Safety and Tolerability of the Acute Ketamine Treatment in Treatment-Resistant Depression: Focus on Comorbidities Interplay with Dissociation and Psychomimetic Symptoms
Source: MDPI journal article supplement (doi:10.3390/ph16020173), 2023-01-24
Supplement: s1 [file s1]

Supplementary File

**Table S1.** Antiepileptic treatment in patients with epilepsy.

| Patient no. | Sex | Age | Age of<br>epilepsy onset | Medication taken | Dose<br>(milligrams<br>daily) |
|-------------|-----|-----|--------------------------|------------------|-------------------------------|
| 1           | M   | 53  | 47                       | levetiracetam    | 750                           |
| 2           | F   | 38  | 3                        | ethosuximide     | 1000                          |
| 3           | F   | 48  | 42                       | levetiracetam    | 750                           |
| 4           | M   | 25  | 6                        | pregabalin       | 450                           |
| 5           | F   | 40  | 37                       | levetiracetam    | 500                           |
| 6           | M   | 41  | 29                       | pregabalin       | 300                           |
